# Supplementary material for: Self-assembled NiO–ZrO2 nanocrystals with mesoscopic void space: An efficient and green catalyst for C–S cross-coupling reaction in water
Source: Royal Society of Chemistry journal article supplement (doi:10.1039/c2dt30343d), 2012-01-01

# Self-assembled NiO-ZrO<sub>2</sub> nanocrystals with mesoscopic void space: an efficient and green catalyst for C-S cross-coupling reaction in water

Nabanita Pal and Asim Bhaumik\*

*Department of Materials Science,*

*Indian Association for the Cultivation of Science, Jadavpur, Kolkata – 700 032, India,*

*E-mail: msab@iacs.res.in*

## Supporting Information

### Captions for Figures

- Figure S1     <sup>1</sup>H NMR spectrum of the isolated C-S coupled product of entry 1.
- Figure S2     <sup>13</sup>C NMR spectrum of the isolated C-S coupled product of entry 1.
- Figure S3     <sup>1</sup>H NMR spectrum of the isolated C-S coupled product of entry 2.
- Figure S4     <sup>13</sup>C NMR spectrum of the isolated C-S coupled product of entry 2.
- Figure S5     <sup>1</sup>H NMR spectrum of the isolated C-S coupled product of entry 3.
- Figure S6     <sup>13</sup>C NMR spectrum of the isolated C-S coupled product of entry 3.

Figure S1 (Pal and Bhaumik)

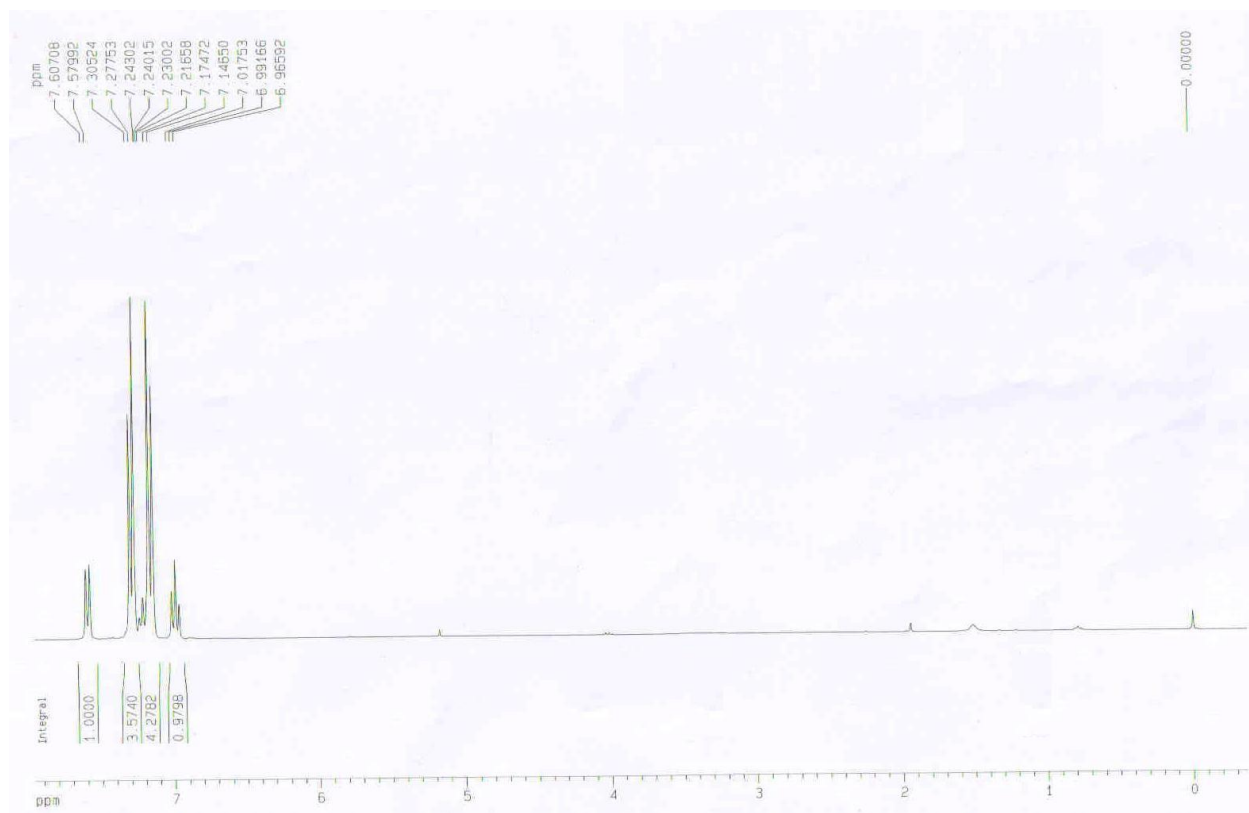

Figure S2 (Pal and Bhaumik)

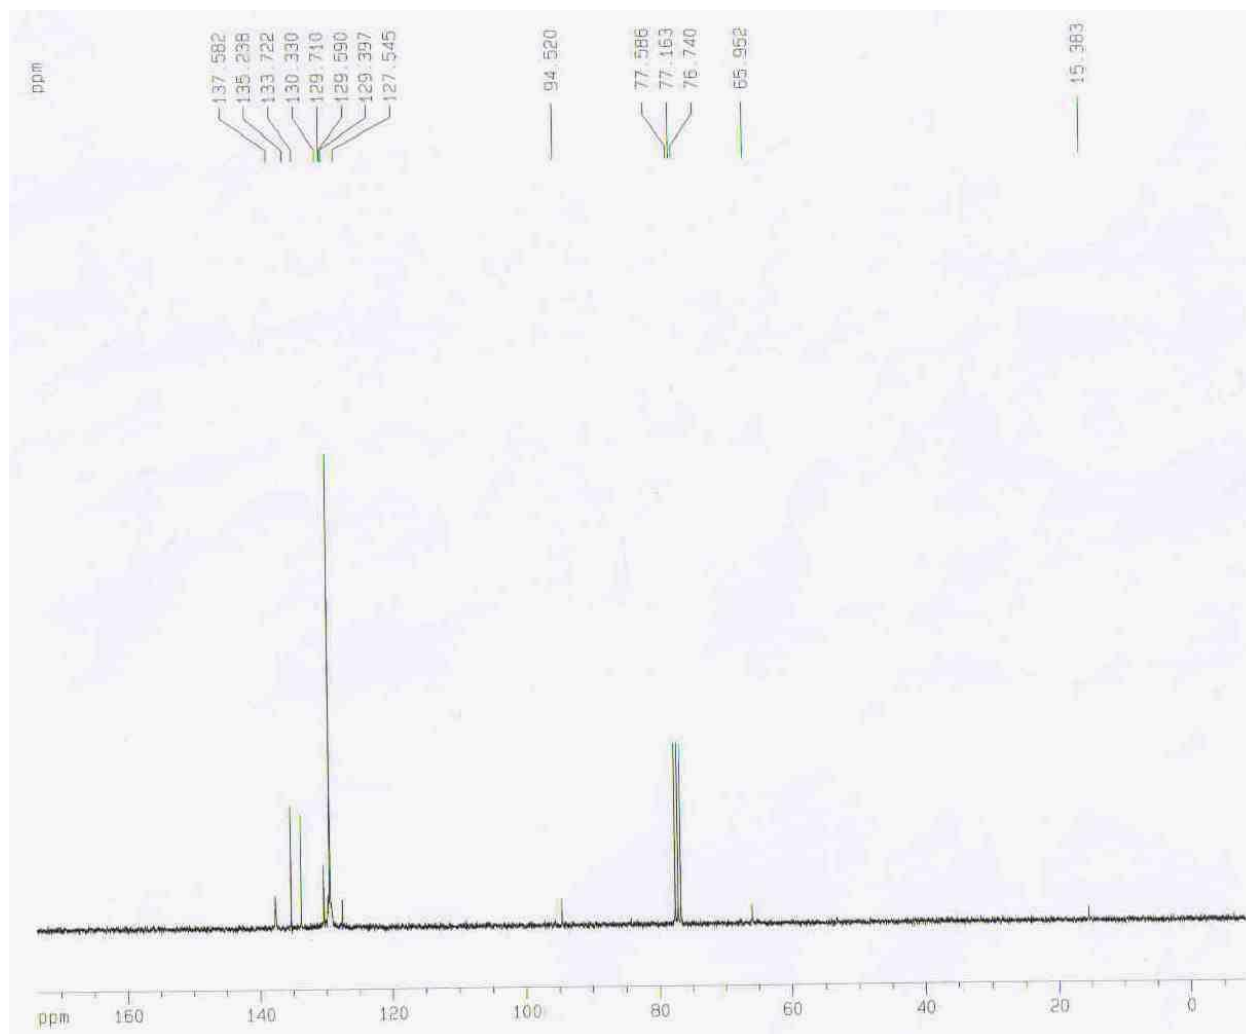

Figure S3 (Pal and Bhaumik)

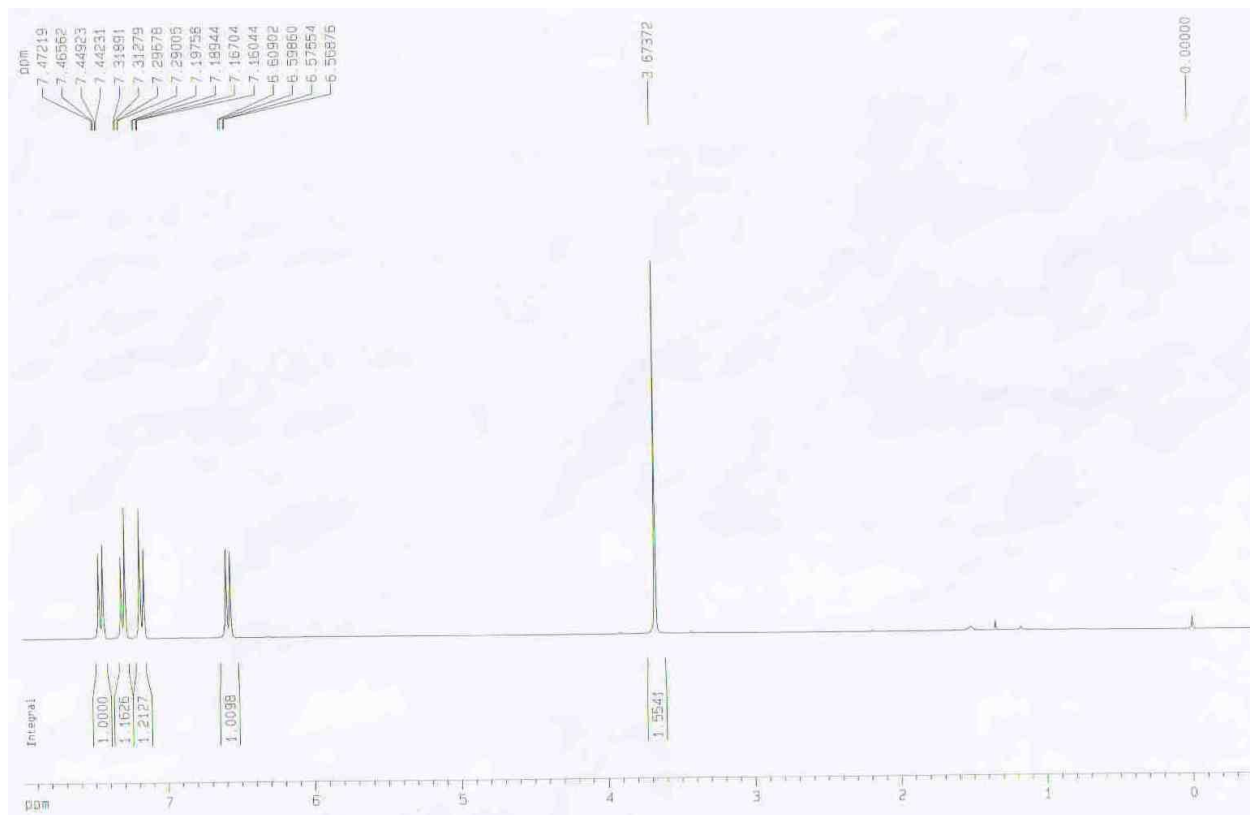

Figure S4 (Pal and Bhaumik)

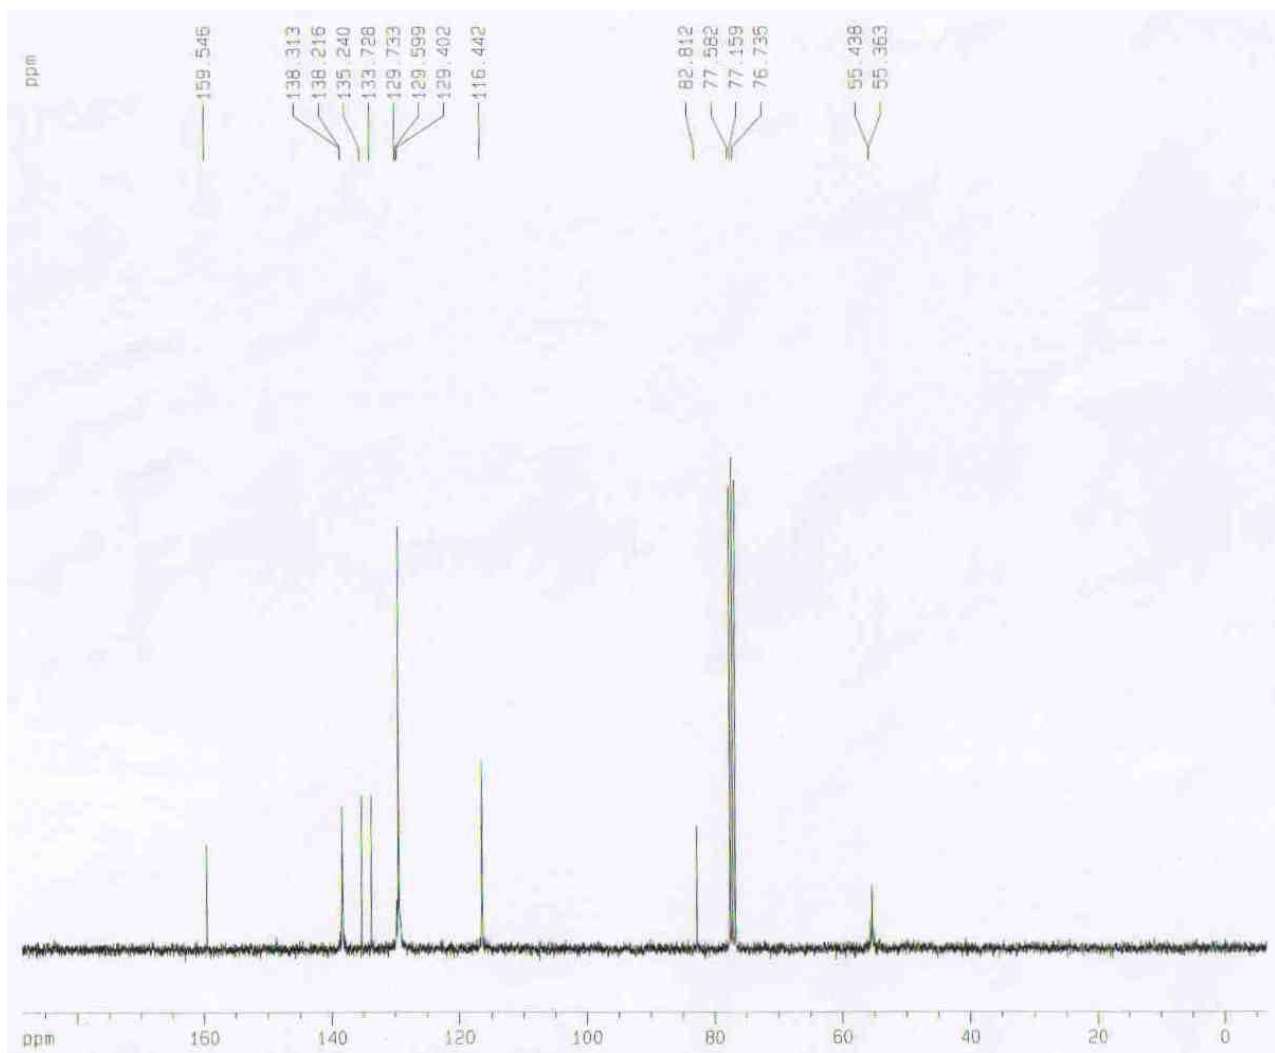

Figure S5 (Pal and Bhaumik)

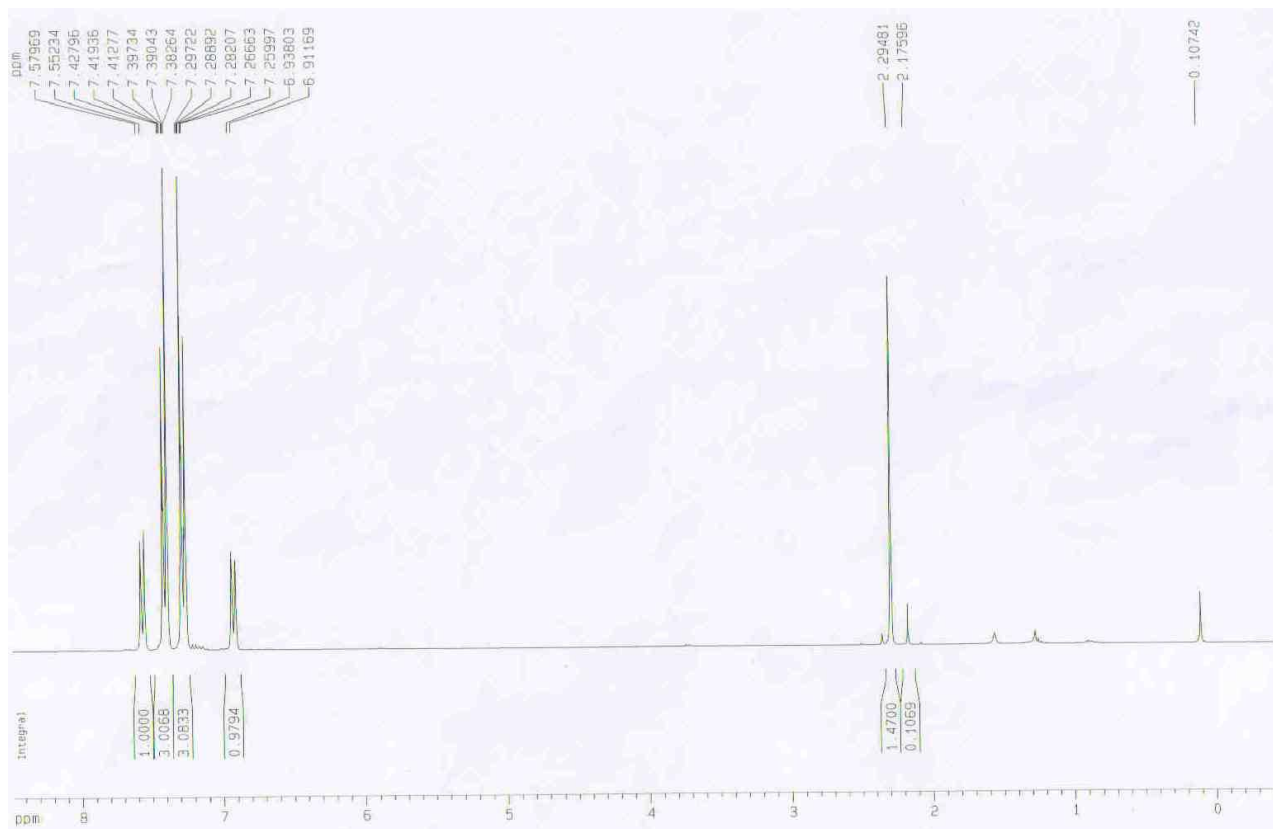

Figure S6 (Pal and Bhaumik)

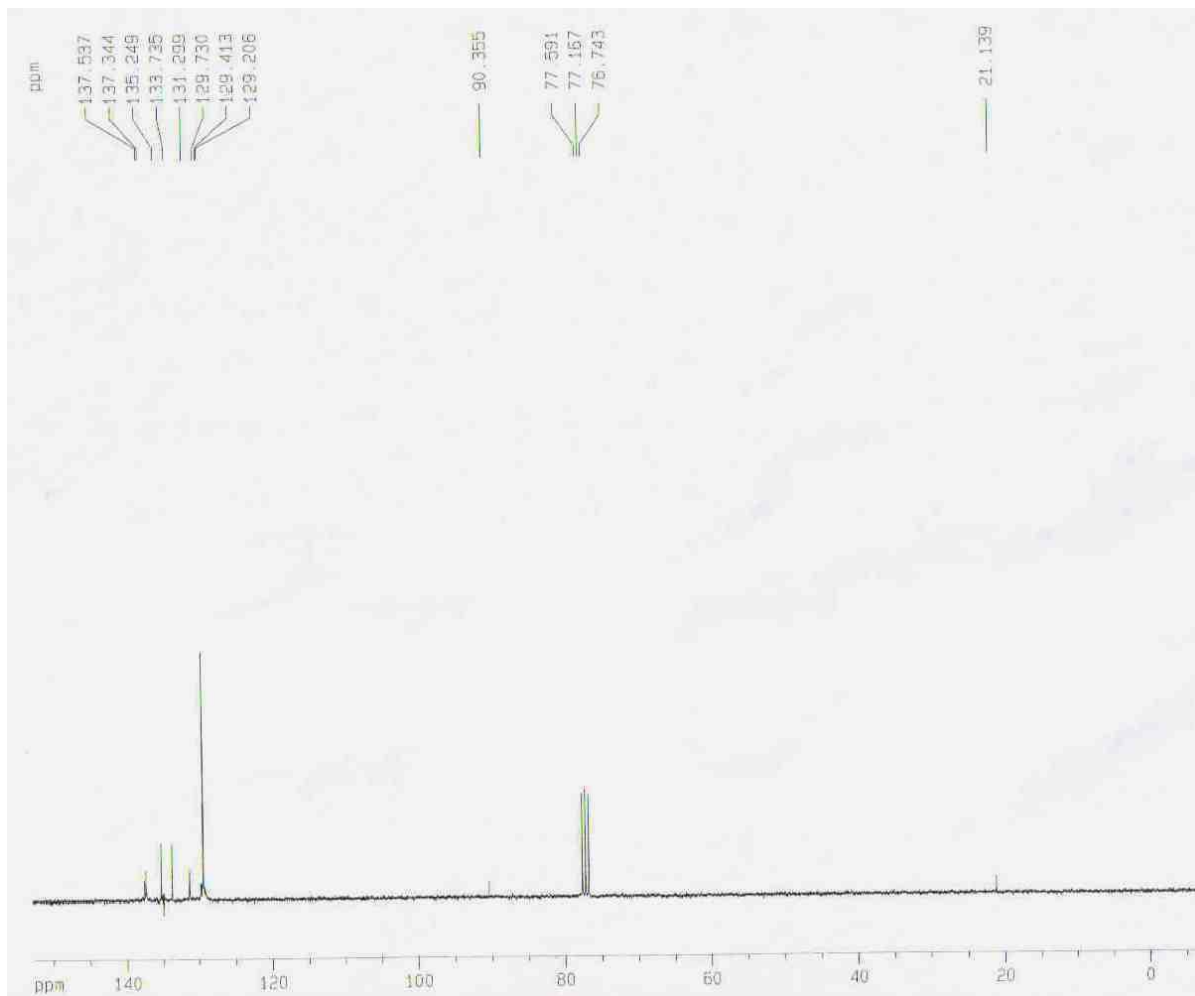

Supplement: c2dt30343d.pdf [file c2dt30343d.pdf]
